# Supplementary material for: An on–off–on fluorescent probe for the detection of glyphosate based on a Cu2+-assisted squaraine dye sensor
Source: Royal Society of Chemistry journal article supplement (doi:10.1039/d3ay02128a), 2024-01-01
Supplement: d3ay02128a1.pdf [file d3ay02128a1.pdf]

ARTICLE

## An on-off-on fluorescent probe for the detection of glyphosate based on Cu<sup>2+</sup>-assisted squaraine dye sensor

Received 00th January 20xx,  
 Accepted 00th January 20xx

Shuhua Zhao<sup>a,b,#</sup>, Lei Shi<sup>a,#</sup>, Xiufeng Zhang<sup>a</sup>, Xiaoran Sun<sup>a</sup>, Wenxuan Zhu<sup>b,c</sup>, Lijia Yu<sup>b,\*</sup>

DOI: 10.1039/x0xx00000x

### Synthesis and characterization of F-0

#### 3-(2-methylbenzo[d]thiazol-3-ium-3-yl)propane-1-sulfonate (compound 1)

2-methylbenzothiazole (1.49 g, 10 mmol) and 1,3-propanesultone lactone (1.83 g, 15 mmol) were added into a 50 ml flask and reacted at 120°C for 5 hours. The product was light yellow solid, which was crushed and washed three times with methanol to obtain compound 1.

#### (Z)-3-oxo-2-((Z)-(3-(3-sulfopropyl)benzo[d]thiazol-2(3H)-ylidene)methyl)-4-((3-(3-sulfopropyl)benzo[d]thiazol-3-ium-2-yl)methylene)cyclobut-1-en-1-olate (F-0)

The squaraine dye (F-0) was synthesized by our previous work. 3-(2-methylbenzo[d]thiazol-3-ium-3-yl)propane-1-sulfonate (0.43 g, 16 mmol) and square acid (0.10 g, 0.88 mmol) were added into 50 ml flask, then 4 ml of n-butanol and 2 ml of pyridine were added, refluxed at 115°C for 12 hours under the argon protection, and the precipitate was washed with ether for three times to obtain bluish-black solid. Silica gel column purification was performed by using DCM/MeOH= 5:1 to obtain F-0. <sup>1</sup>H NMR (400 MHz, DMSO) δ 7.84 (d, J = 7.7 Hz, 2H), 7.66 (d, J = 8.3 Hz, 2H), 7.43 (s, 2H), 7.25 (s, 2H), 5.84 (s, 2H), 4.39 (s, 4H), 2.60 (d, J = 7.0 Hz, 4H), 2.01 (s, 4H).

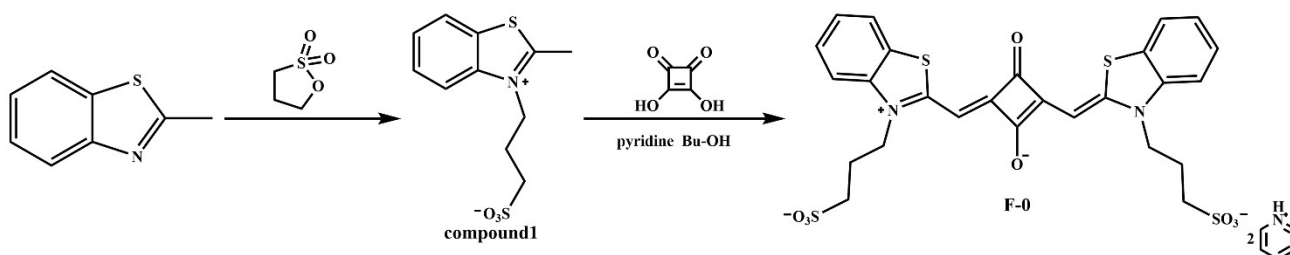

Scheme S1 The synthesis route for F-0

<sup>a</sup> North China University of Science and Technology, Tangshan, 063210, China.

<sup>b</sup> National Center for Occupational Safety and Health, NHC, Beijing, 102308, China.

<sup>c</sup> University of South China, Hengyang, 421001, China.

<sup>d</sup> # Shuhua Zhao and Lei Shi contributed equally.

<sup>e</sup> \* Corresponding Author, e-mail: yulijia@iccas.ac.cn.

<sup>f</sup> Electronic Supplementary Information (ESI) available: [details of any supplementary information available should be included here]. See

DOI: 10.1039/x0xx00000x

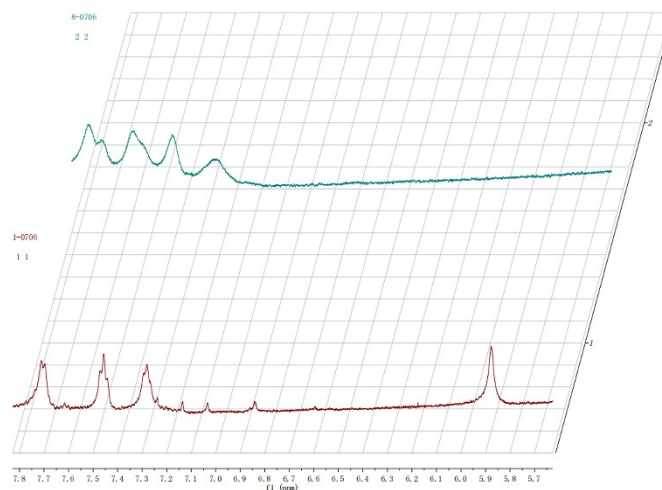

Chart S1 The  $^1\text{H-NMR}$  spectra of F-0 (deep red line) in Dimethyl sulfoxide- $d_6$ , and the  $^1\text{H-NMR}$  spectra of 23.8 mmol/L F-0 with 1 eq  $\text{Cu}^{2+}$  in  $\text{D}_2\text{O}$  after 1 h incubation (blue line).

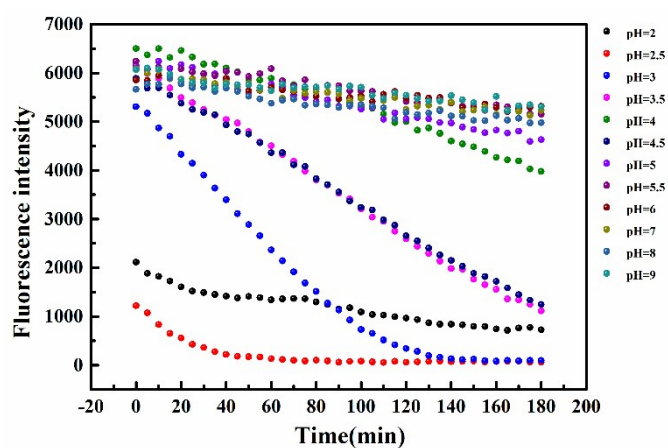

Chart S2 The fluorescence intensity of F-0 at 658 nm changes with time in different pH environments.

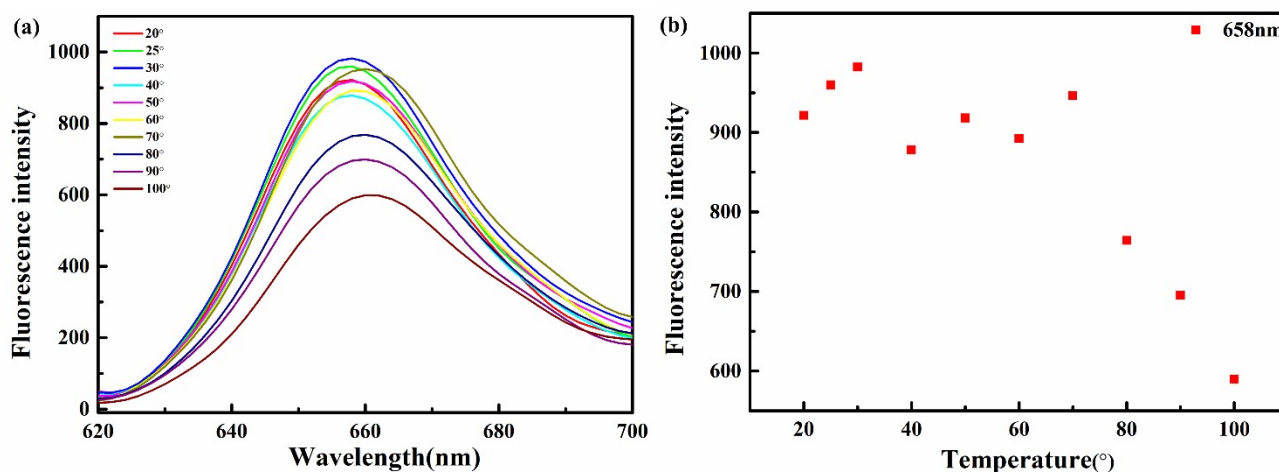

Chart S3 (a) The change of F-0 fluorescence spectrum with temperature (b) The change of F-0 fluorescence intensity at 658 nm with temperature.

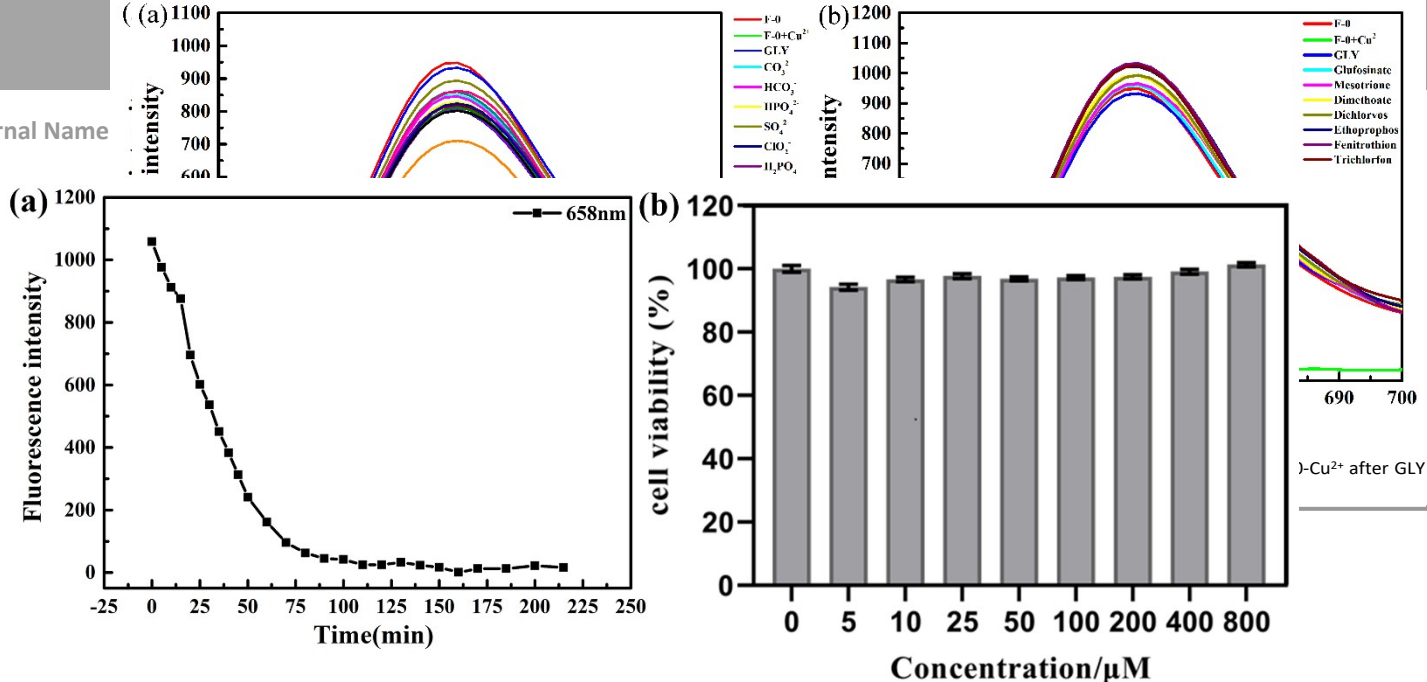

Chart S4 (a) Fluorescence intensity of F-0 at 658 nm after natural light irradiation for different times (b) Cell viability value (%) of A375 cells in different concentrations of F-0.

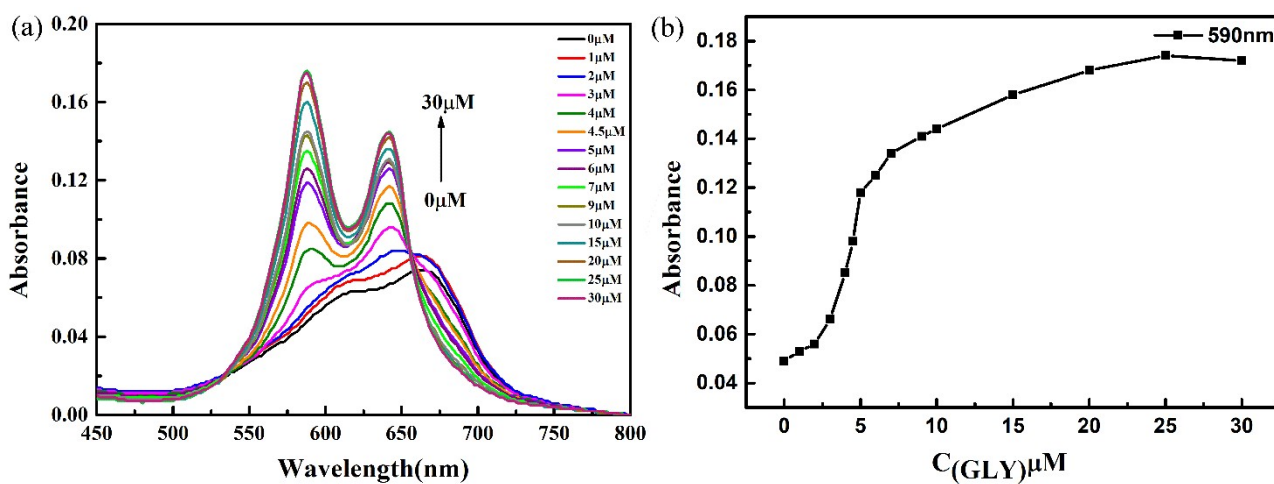

Chart S5 (a) UV-vis absorption spectra of F-0 (15 μmol/L) at different concentrations of GLY (0-30 μmol/L) in the presence of Cu<sup>2+</sup> (5 μmol/L) (b) With the increase of GLY concentration (0-30 μmol/L), the change curve of F-0 absorbance value at 590 nm. All spectral experiments were performed in PBS.

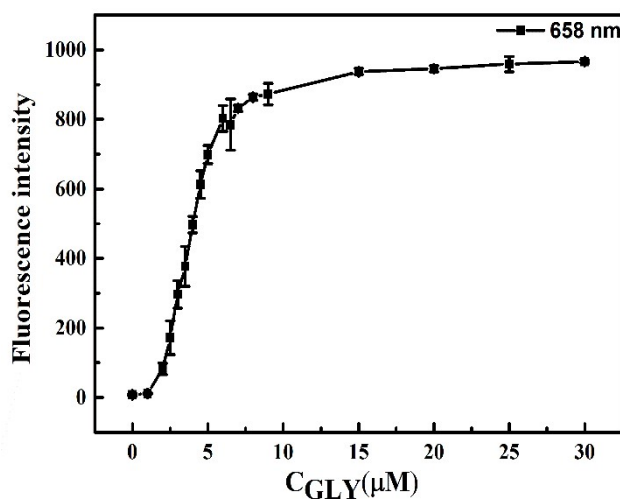

Chart S6 With the increase of GLY concentration (0-30 μmol/L), the change curve of F-0 fluorescence intensity at 658 nm. All spectral experiments were performed in PBS.  $\lambda_{ex} = 590$  nm. Error bars represent mean values  $\pm$  SD. (n = 3).
